# Supplementary material for: SiOC nanolayer wrapped 3D interconnected graphene sponge as a high-performance anode for lithium ion batteries
Source: Royal Society of Chemistry journal article supplement (doi:10.1039/c8ta01570h), 2018-01-01
Supplement: c8ta01570h1.pdf [file c8ta01570h1.pdf]

## **SiOC Nanolayers Wrapped 3D Interconnected Graphene Sponge as High-Performance Anodes for Lithium Ion Batteries**

Zhiyuan Sang<sup>a</sup>, Zihao Zhao<sup>a</sup>, Dong Su<sup>a\*</sup>, Peishuang Miao<sup>a</sup>, Fengrui Zhang<sup>a</sup>,  
Huiming Ji<sup>a\*</sup>, Xiao Yan<sup>b</sup>

<sup>a</sup> Key Laboratory for Advanced Ceramics and Machining Technology of Ministry of  
Education, School of Materials Science and Engineering, Tianjin University, Tianjin  
300350, P.R. China

<sup>b</sup> Guangdong Key Laboratory of Membrane Materials and Membrane Separation,  
Guangzhou Institute of Advanced Technology, Chinese Academy of Sciences,  
Guangzhou 511452, China

---

\*Corresponding author: Dong Su (E-mail: [sudong@tju.edu.cn](mailto:sudong@tju.edu.cn), Tel: 0086-13920782557)

\*Corresponding author: Huiming Ji (E-mail: [jihuiming@tju.edu.cn](mailto:jihuiming@tju.edu.cn), Tel: 13642050311)

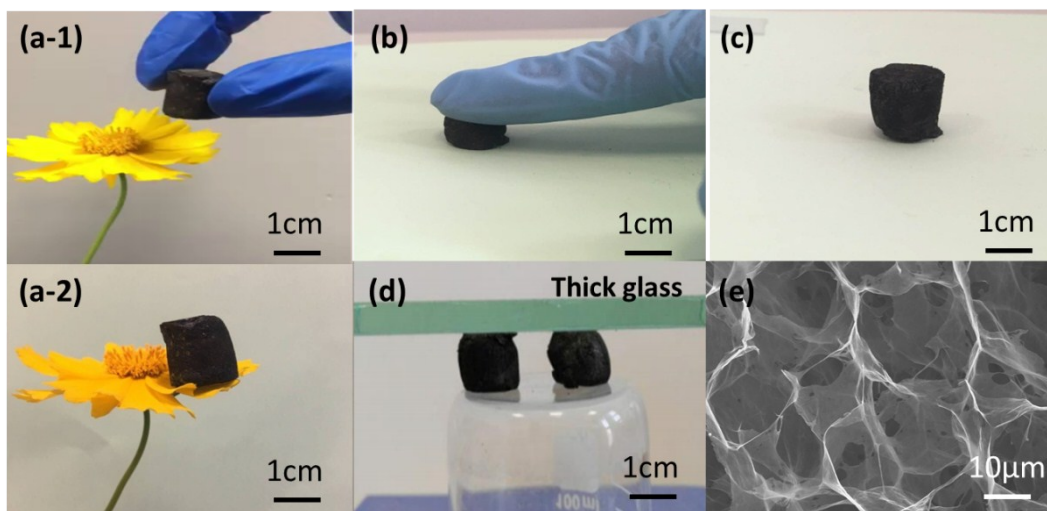

Fig. S1 Ultra-light , high-strength and compressibility of the 3D-GNS

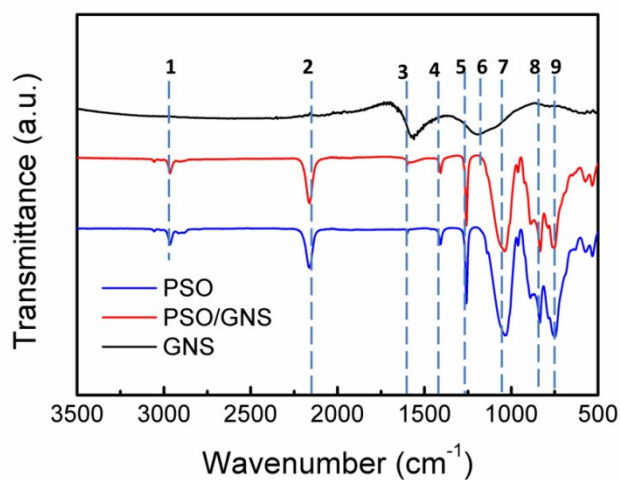

Fig. S2 Fourier transform infrared (FTIR) spectrum of the 3D-GNS, PSO and 3D-PSO/GNS.

1. C-H 2. Si-H 3. C=C 4. Si-CH<sub>3</sub>/O-H 5. Si-CH<sub>3</sub>/C-OH 6. C-O/C-O-C  
7. Si-O 8-9. Si-C

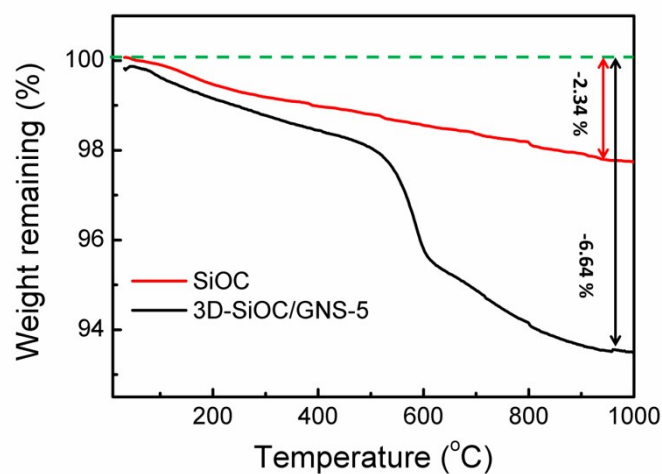

Fig. S3 TG analysis of the SiOC and 3D-GNS/SiOC-5.

Thermogravimetry analysis (TGA, Netzsch STA 449F3, Germany) was carried with a heating rate of 10°C/min under air to determined the ratio of GNS in the nanocomposites.

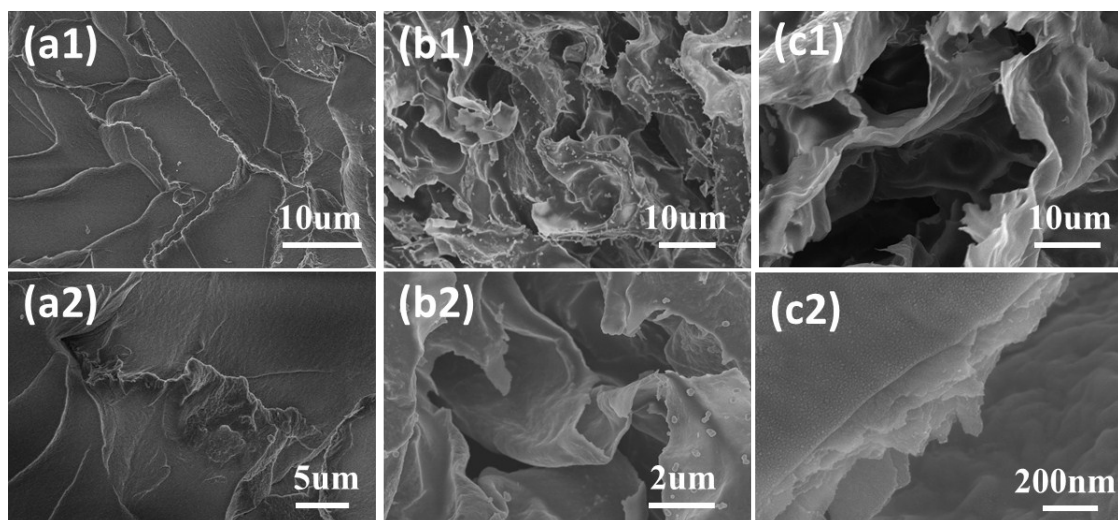

Fig. S4 SEM morphologies of 3D-GNS/SiOC with different content of GNS: (a) 3D-GNS/SiOC-L (1wt.%-GNS) (b) 3D-GNS/SiOC (5wt.%-GNS) (c) 3D-GNS/SiOC-H (10wt.%-GNS)

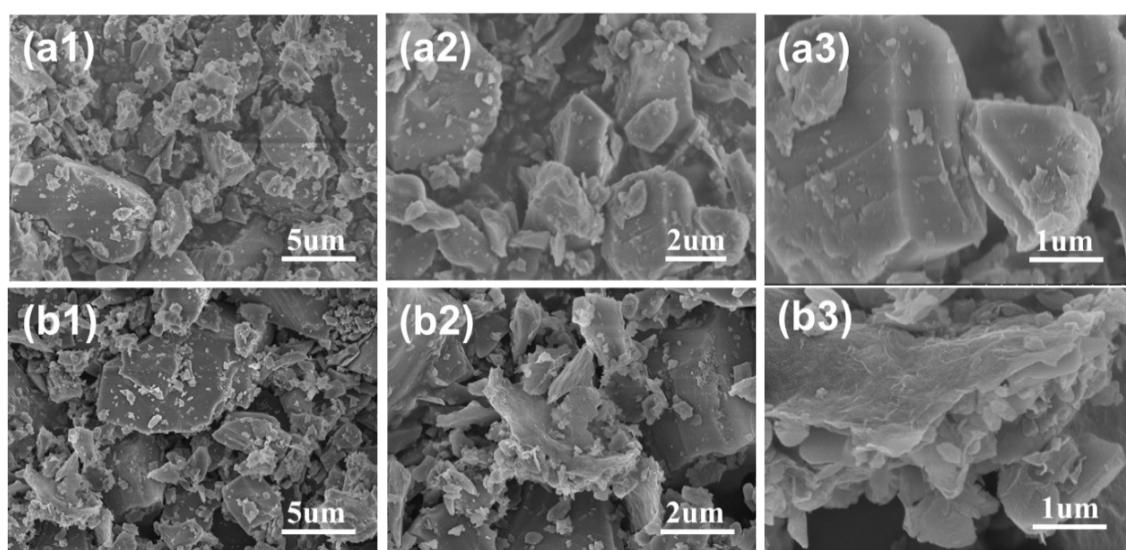

Fig. S5 SEM morphologies of (a) SiOC and (b) m-GNS/SiOC

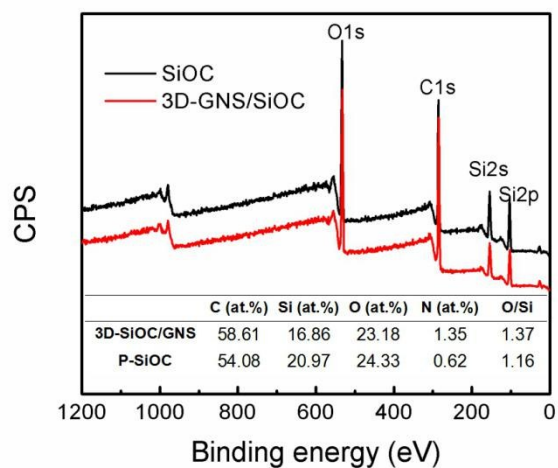

Fig. S6 XPS survey spectra of SiOC and 3D-GNS/SiOC.

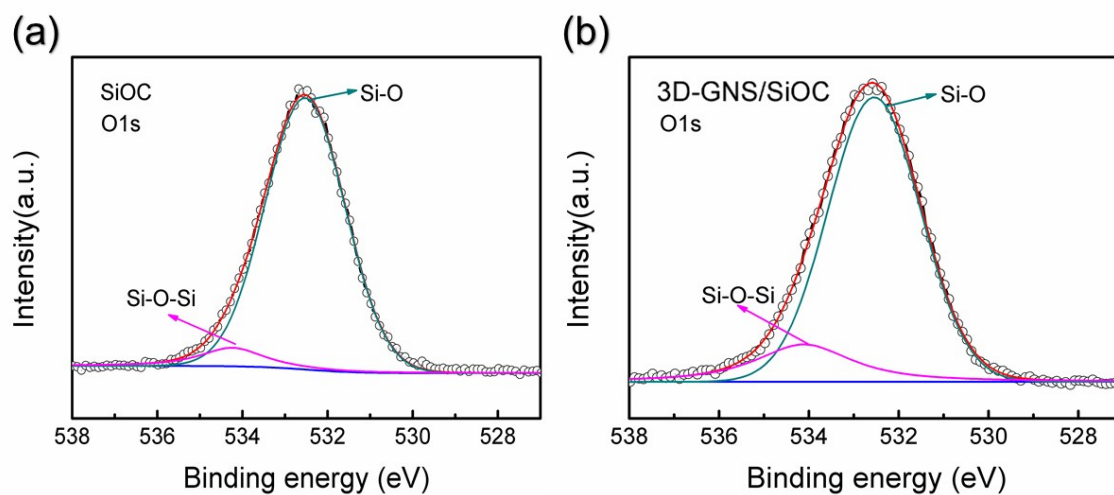

Fig. S7 High-resolution XPS spectra of O1s of SiOC and 3D-GNS/SiOC.

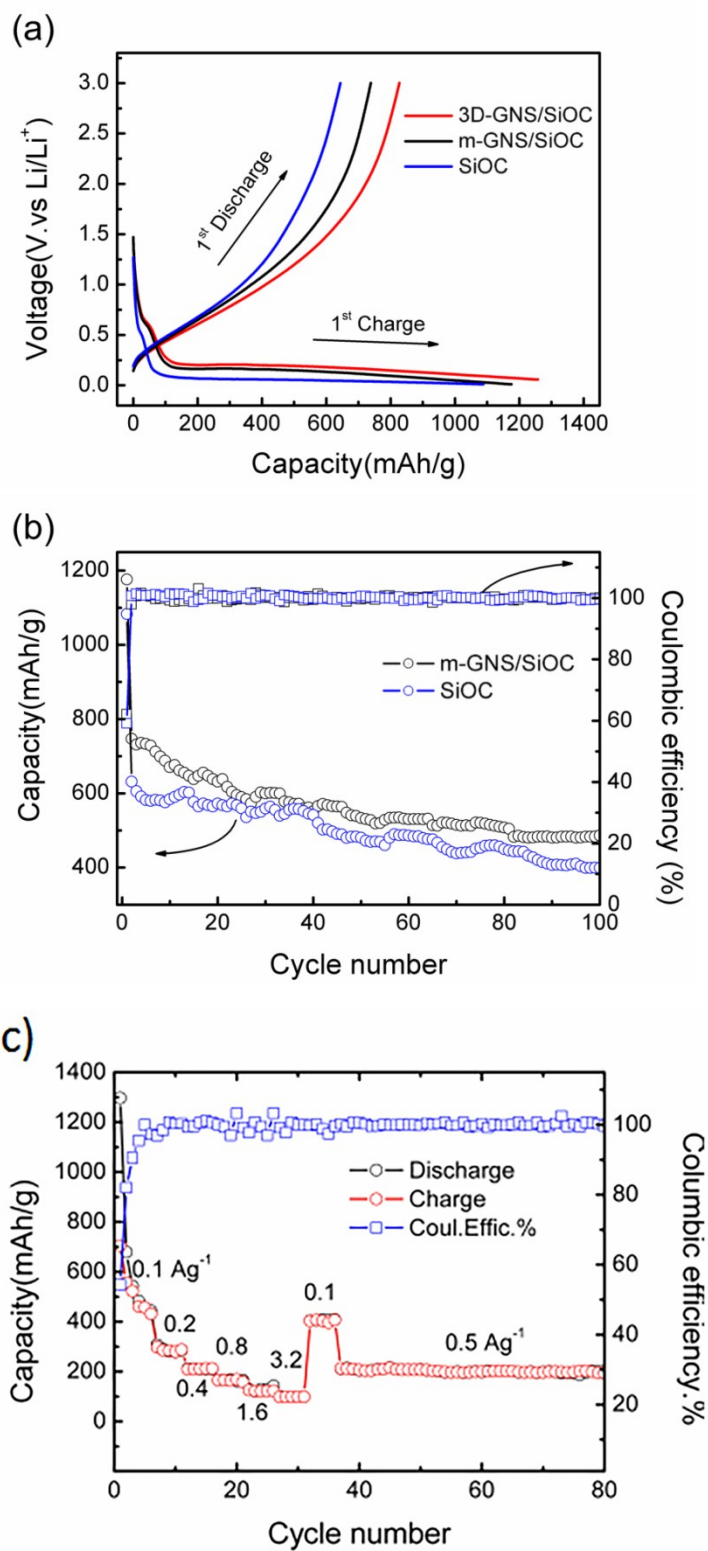

Fig. S8 Electrochemical performances:(a) discharge/charge profiles of p-SiOC, m-GNS/SiOC and 3D-GNS/SiOC at 0.1 A/g (b) the cycling performance of SiOC, m-GNS/SiOC at 0.1 A/g. (c) the rate and cycling performance of 3D-GNS.

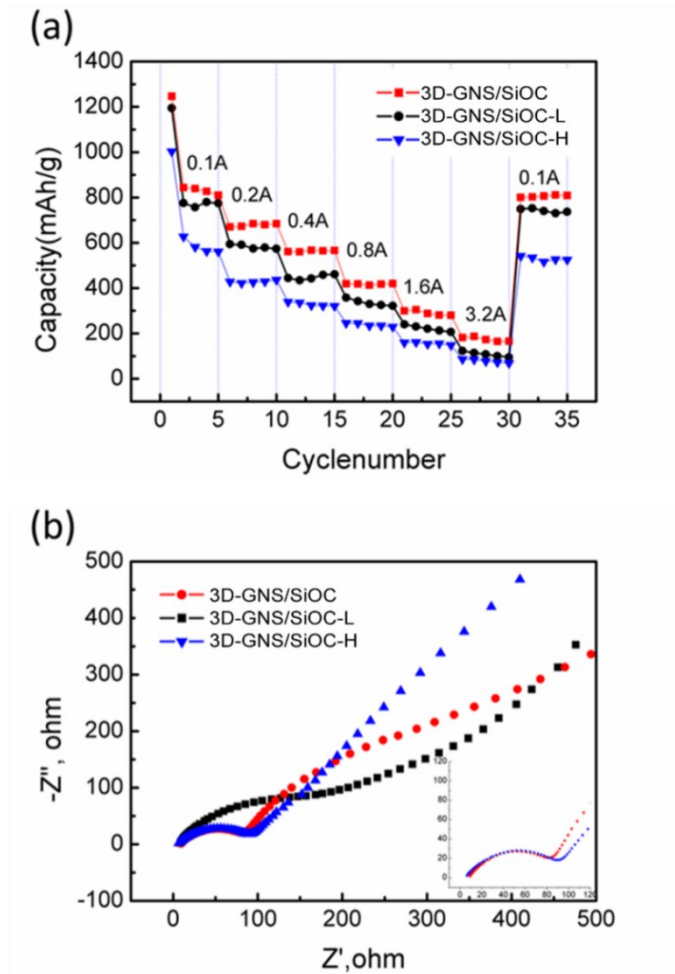

Fig. S9 The electrochemical performance of 3D-GNS/SiOC, 3D-GNS/SiOC-L and 3D-GNS/SiOC-H: (a) the rate performance (b) the EIS plots.

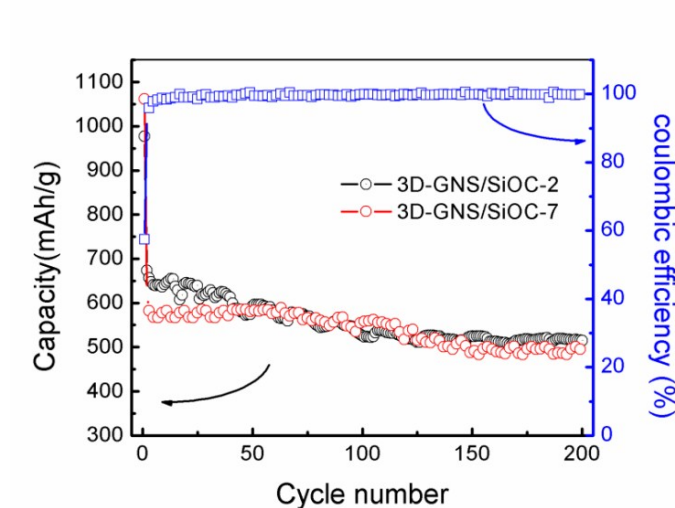

Fig. S10 The cycling performance of 3D-GNS/SiOC-2 and 3D-GNS/SiOC-7 at  $0.5A\ g^{-1}$  (3D-GNS/SiOC-X, where X shows the percent of GNS loading about 2wt.% and 7wt.%, respectively).

Table S1. Peak assignment of Si2p of SiOC and 3D-GNS/SiOC

| Sample      | Binding Energy (eV) | Assignment                      | Atom% |
|-------------|---------------------|---------------------------------|-------|
| P-SiOC      | 101.2               | SiOC <sub>3</sub>               | 16.88 |
|             | 102.1               | SiO <sub>2</sub> C <sub>2</sub> | 35.12 |
|             | 103.0               | SiO <sub>3</sub> C              | 33.44 |
|             | 104.2               | SiO <sub>4</sub>                | 14.56 |
| 3D-GNS/SiOC | 101.4               | SiOC <sub>3</sub>               | 13.53 |
|             | 102.0               | SiO <sub>2</sub> C <sub>2</sub> | 28.25 |
|             | 103.1               | SiO <sub>3</sub> C              | 37.82 |
|             | 104.4               | SiO <sub>4</sub>                | 20.40 |

Table S2. Peak assignment of C1s and O1s of SiOC and 3D-GNS/SiOC, respectively

| Sample      | Element | Binding Energy (eV) | Assignment                           | Atom% |
|-------------|---------|---------------------|--------------------------------------|-------|
| P-SiOC      | C 1s    | 284.6               | sp <sup>2</sup> /sp <sup>3</sup> C-C | 77.05 |
|             |         | 286.5               | C-O                                  | 6.13  |
|             |         | 283.7               | C-Si                                 | 16.82 |
|             | O1s     | 532.5               | Si-O                                 | 93.08 |
|             |         | 534.2               | Si-O-Si                              | 6.92  |
|             |         | 284.6               | sp <sup>2</sup> /sp <sup>3</sup> C-C | 80.88 |
| 3D-GNS/SiOC | C 1s    | 286.4               | C-O                                  | 14.38 |
|             |         | 283.8               | C-Si                                 | 4.74  |
|             | O1s     | 532.5               | Si-O                                 | 84.10 |
|             |         | 534.1               | Si-O-Si                              | 15.90 |



Table S3. EIS fitting results of SiOC, m-GNS/SiOC and 3D-GNS/SiOC anode

| Parameter       | SiOC   | m-GNS/SiOC | 3D-GNS/SiOC |
|-----------------|--------|------------|-------------|
| $R_o/\Omega$    | 9.397  | 4.864      | 3.069       |
| $R_{ct}/\Omega$ | 161.4  | 81.76      | 44.7        |
| CPE-T/ $\mu$ F  | 14.329 | 29.1       | 31.45       |
| $W_s-R/\Omega$  | 25554  | 22609      | 8991        |

Table S4. Comparison of electrochemical properties of the 3D-GNS/SiOC composites with other Si-O-C anode materials for LIBs

| Samples                               | Current density              | Cycles     | Capacity<br>(mAh g <sup>-1</sup> ) | Ref./Year          |
|---------------------------------------|------------------------------|------------|------------------------------------|--------------------|
| C-rich SiOC                           | 74 mA g <sup>-1</sup>        | 30         | 460                                | 2016 <sup>1</sup>  |
| HF-etched SiOC                        | 200 mA g <sup>-1</sup>       | 100        | 572                                | 2016 <sup>2</sup>  |
| SiOC aerogel                          | 360 mA g <sup>-1</sup>       | 50         | 600                                | 2015 <sup>3</sup>  |
| SiOC/C fiber                          | 50 mA g <sup>-1</sup>        | 60         | 669                                | 2014 <sup>4</sup>  |
| SiOC/BN nanotubes                     | 100 mA g <sup>-1</sup>       | 25         | 450                                | 2017 <sup>5</sup>  |
| SiOC-CNT Shell/Core                   | 100 mA g <sup>-1</sup>       | 40         | 686.3                              | 2013 <sup>6</sup>  |
| Intercalated SiOC/GNS                 | 50 mA g <sup>-1</sup>        | 90         | 582                                | 2015 <sup>7</sup>  |
| Layered SiOC/GNS                      | 40 mA g <sup>-1</sup>        | 20         | 357                                | 2009 <sup>8</sup>  |
| SiOC/GNS Paper                        | 100 mA g <sup>-1</sup>       | 1020       | 588                                | 2016 <sup>9</sup>  |
| SiOC/GNS Paper                        | 100 mA g <sup>-1</sup>       | 30         | 400                                | 2016 <sup>10</sup> |
| SiO <sub>x</sub> -C/GNS               | 100 mA g <sup>-1</sup>       | 250        | 630                                | 2015 <sup>11</sup> |
| 3D SiO <sub>2</sub> @Graphene Aerogel | 500 mA g <sup>-1</sup>       | 300        | 300                                | 2015 <sup>12</sup> |
| <b>3D- GNS/SiOC</b>                   | <b>500 mA g<sup>-1</sup></b> | <b>200</b> | <b>586.6</b>                       | <b>This work</b>   |
|                                       | <b>100 mA g<sup>-1</sup></b> | <b>100</b> | <b>701.5</b>                       | <b>This work</b>   |

## Reference

1. J. Kaspar, M. Graczyk-Zajac, S. Choudhury and R. Riedel, *Electrochim. Acta*, 2016, **216**, 196-202
2. M. Ma, H. Wang, M. Niu, L. Su, X. Fan, J. Deng, Y. Zhang and X. Du, *RSC Adv.*, 2016, **6**, 43316-43321.
3. V. S. Pradeep, D. G. Ayana, M. Graczyk-Zajac, G. D. Soraru and R. Riedel, *Electrochim. Acta*, 2015, **157**, 41-45
4. Li, Y.; Hu, Y.; Lu, Y.; Zhang, S.; Xu, G.; Fu, K.; Li, S.; Chen, C.; Zhou, L.; Xia, X.; Zhang, X. *J. Power Sources*, **2014**, 254, 33-38.
5. Abass, M. A., Syed, A. A., Gervais, C., & Singh, G, *Rsc Adv.*, 2017, **7**, 21576-21584.
6. R. Bhandavat and G. Singh, *J. Phys. Chem. C*, 2013, **117**, 11899-11905.
7. Y. Ren, B. Yang, X. Huang, F. Chu, J. Qiu and J. Ding, *Solid State Ionics*, 2015, **278**, 198-202
8. F. Ji, Y. L. Li, J. M. Feng, D. Su, Y. Y. Wen, Y. Feng and F. Hou, *J. Mater. Chem.*, 2009, **19**, 9063-9067.
9. L. David, R. Bhandavat, U. Barrera and G. Singh, *Nat. Commun.*, 2016, **7**, 10998.
10. L. David, K. M. Shareef, M. A. Abass and G. Singh, *Rsc Adv.*, 2016, **6**, 53894-53902.
11. M. Q. Li, Y. Yu, J. Li, B. L. Chen, A. Konarov and P. Chen, *J. Power Sources*, 2015, **293**, 976-982.
12. J. Meng, Y. Cao, Y. Suo, Y. Liu, J. Zhang and X. Zheng, *Electrochim. Acta*, 2015, **176**, 1001-1009.
